# Supplementary material for: All-thiolate-stabilized Ag42 nanocluster with a tetrahedral kernel and its transformation to an Ag61 nanocluster with a bi-tetrahedral kernel
Source: Royal Society of Chemistry journal article supplement (doi:10.1039/d0cc02537b), 2020-01-01
Supplement: d0cc02537b1.pdf [file d0cc02537b1.pdf]

## Supporting Information

### **All-Thiolate-Stabilized Ag<sub>42</sub> Nanocluster with a Tetrahedral Kernel Bi-Tetrahedral Kernel**

Tao Chen,<sup>‡</sup> Sha Yang,<sup>‡</sup> Yongbo Song,<sup>\*</sup> Jinsong Chai, Qinzhen Li, Xiangyu Ma, Guang Li, Haizhu Yu,<sup>\*</sup>  
Manzhou Zhu<sup>\*</sup>

## Table of Contents

- Figure S1.** UV-vis and ESI-MS spectra of water-soluble precursor in presence of NaSbF<sub>6</sub>.
- Figure S2.** UV-vis and ESI-MS spectra of water-soluble precursors in the absence of NaSbF<sub>6</sub>.
- Figure S3.** Digital photographs of products obtained by two phase ligand exchange.
- Figure S4.** <sup>19</sup>F-NMR of **Ag**<sub>42</sub> and **Ag**<sub>61</sub>.
- Figure S5.** The total structure compares three C<sub>2</sub> symmetry axis perpendicular to each other.
- Figure S6.** The bond length distributions in the **Ag**<sub>42</sub> nanocluster.
- Figure S7.** The triangle growth of the kernel of **Ag**<sub>42</sub>, and the two face-fused bi-tetrahedron in **Ag**<sub>61</sub>.
- Figure S8.** The binding mode of μ<sub>3</sub>-Cl atom with the three neighboring silver atoms.
- Figure S9.** The bond length distributions in the **Ag**<sub>61</sub> nanocluster.
- Figure S10.** UV-vis-NIR spectra of **Ag**<sub>42</sub> and **Ag**<sub>61</sub>.
- Figure S11.** Temperature-dependent UV-vis spectra of **Ag**<sub>42</sub> and **Ag**<sub>61</sub>.
- Figure S12.** XPS spectra of **Ag**<sub>42</sub> and **Ag**<sub>61</sub>
- Figure S13.** TGA of **Ag**<sub>42</sub> and **Ag**<sub>61</sub>.
- Figure S14.** <sup>1</sup>H-NMR spectrum of the **Ag**<sub>42</sub> nanocluster.
- Figure S15.** <sup>1</sup>H-NMR spectrum of the **Ag**<sub>61</sub> nanocluster
- Figure S16.** <sup>2</sup>H-NMR spectra of **Ag**<sub>42</sub>-D, **Ag**<sub>61</sub>-D, and standard samples.
- Figure S17.** ESI-MS spectra of **Ag**<sub>42</sub>-D and **Ag**<sub>61</sub>-D.
- Figure S18.** MALDI-MS spectrum of **Ag**<sub>42</sub>.
- Figure S19.** MALDI-MS spectrum of **Ag**<sub>61</sub>.
- Figure S20.** Thermostability of **Ag**<sub>42</sub> and **Ag**<sub>61</sub>.
- Figure S21.** Thermostability of [Ag<sub>25</sub>(SPhMe<sub>2</sub>)<sub>18</sub>]<sup>-</sup> at room temperature.
- Figure S22.** Photoluminescence spectra of Ag<sub>25</sub>(SR)<sub>18</sub><sup>-</sup>, Ag<sub>42</sub>(SR)<sub>24</sub>, Ag<sub>44</sub>(SR)<sub>30</sub><sup>4-</sup> and Ag<sub>61</sub>(SR)<sub>40</sub>Cl.

## Experimental Procedures

### 1. Chemicals:

All reagents and solvents were commercially purchased and used as received without further purification, including silver nitrate ( $\text{AgNO}_3$ , 99%), *tert*-butyl mercaptan ( $\geq 99.99\%$ ), cyclohexyl mercaptan ( $\geq 99.99\%$ ), 2-methyltetrahydrofuran ( $\geq 99.99\%$ ), glutathione (GSH,  $\geq 99.99\%$ ) tetraoctylammonium chloride (TOACl,  $\geq 99.99\%$ ), Sodium hexafluoro antimonate ( $\text{NaSbF}_6$ ,  $\geq 99.99\%$ ) sodium borohydride ( $\text{NaBH}_4$ ,  $> 98\%$ ), methanol (HPLC grade,  $\geq 99.9\%$ ), dichloromethane (HPLC grade,  $\geq 99.9\%$ ) and ethanol (HPLC grade,  $\geq 99.9\%$ ). All glassware was cleaned with aqua regia ( $\text{HCl}:\text{HNO}_3 = 3:1$  vol%), washed with copious nanopure water, and then dried in an oven prior to use.

### Synthesis of nanoclusters $\text{Ag}_{42}(\text{SBU}^{\dagger})_{24}$ .

$\text{Ag}_{42}(\text{SBU}^{\dagger})_{24}$  was synthesized by a two-step synthetic method.

- (i) The synthesis of the precursor  $\text{Ag}_m(\text{SG})_n$ .  $\text{AgNO}_3$  (49.4 mg, 0.3 mmol) was first dissolved in 2 mL of water in a 50 mL single-neck round-bottom flask and then mixed with 8 mL of water. Then, GSH (200 mg, 0.65 mmol),  $\text{NaSbF}_6$  (77.6 mg, 0.3 mmol) and NaOH (40mg, 1mmol) was added into the mixture. After about 20 min, 2 mL of  $\text{NaBH}_4$  aqueous solution (18.0 mg/mL) was quickly added into solution under vigorous stirring. The color of the solution turned to yellow and then to black within about 1 min. The reaction was then continued for 3 hours. After that, the precursors were obtained.
- (ii) Two-Phase Ligand Exchange. The obtained aqueous solution of  $\text{Ag}_m(\text{SG})_n$  was mixed with 15 mL  $\text{CH}_2\text{Cl}_2$  and 2 mL *tert*-butyl mercaptan. The solution was reacted for 12 h at room temperature with vigorous stirring. The  $\text{Ag}_m(\text{SG})_n$  NCs were found to transfer from the aqueous phase to the organic phase. Then, water was removed, and the organic phase was washed with ethanol for three times to remove excess thiolate. The  $\text{Ag}_{42}(\text{SBU}^{\dagger})_{24}$  NCs were then crystallized in  $\text{CH}_2\text{Cl}_2/\text{CH}_3\text{OH}$ , and black crystals were obtained after about one week.

### Synthesis of nanoclusters $\text{Ag}_{61}(\text{SC}_6\text{H}_{11})_{40}\text{Cl}$ .

The synthetic method of  $\text{Ag}_{61}(\text{SC}_6\text{H}_{11})_{40}\text{Cl}$  was similar to that of  $\text{Ag}_{42}(\text{SBU}^{\dagger})_{24}$ . The first step (i.e. synthesis of the precursors) was the same, but *tert*-butyl mercaptan was replaced by cyclohexanethiol in the second step, and additional TOACl was added as Cl resources and to promote the phase transfer.

### The transformation of $\text{Ag}_{42}$ to $\text{Ag}_{61}$ NCs

10 mg of  $\text{Ag}_{42}(\text{SBU}^{\dagger})_{24}$  NCs was dissolved in 1 mL of dichloromethane (DCM), and 0.5 mL of cyclohexanethiol and 10 mg TOACl were added. After about 6 hours, the  $\text{Ag}_{42}$  was transformed to crude  $\text{Ag}_{61}$ , which was further purified by  $\text{CH}_2\text{Cl}_2/\text{MeOH}$  solvent to obtain  $\text{Ag}_{61}$  nanocluster.

### 2. Characterization:

The UV-Vis-NIR absorption spectra were recorded using an Agilent 8453 diode array spectrometer (in  $\text{CH}_2\text{Cl}_2$ , and 2-methyltetrahydrofuran was used for time-dependent UV-Vis tests), whose background correction was made using a  $\text{CH}_2\text{Cl}_2$  and 2-methyltetrahydrofuran blank, accordingly. Solid samples were first dissolved in  $\text{CH}_2\text{Cl}_2$  to make a dilute solution, with a subsequent transformation to a 1 cm path length quartz cuvette, followed by spectral measurements.

Thermogravimetric analysis (TGA) was carried out on a thermogravimetric analyzer (DTG-60H, Shimadzu Instruments, Inc.) with 10.4356 mg of the  $\text{Ag}_{42}(\text{SBU}^{\dagger})_{24}$  and 12.5941 mg of the  $\text{Ag}_{61}(\text{SC}_6\text{H}_{11})_{40}\text{Cl}$  NCs in a  $\text{SiO}_2$  pan at a heating rate of 10 K/min from 283 K to 1073 K.

X-ray photoelectron spectroscopy (XPS) measurements were performed on a Thermo ESCALAB 250 configured with a monochromated  $\text{AlK}\alpha$  (1486.8 eV) 150W X-ray source, 0.5 mm circular spot size, a flood gun to counter charging effects, and the analysis chamber base pressure lower than  $1 \times 10^{-9}$  mbar. Data were collected with  $\text{FAT}=20$  eV.

Electrospray ionization mass spectra (ESI-MS) were recorded using a Waters UPLC H-class/Xevo G2-XS Qtof mass spectrometer. The sample was directly infused into the pump at 5  $\mu\text{L}/\text{min}$ . ESI sample was prepared by dissolving in mixed solution of dichloromethane/methanol.

NMR measurements were performed on a JNM-ECZ600R instrument. The data was collected with  $\sim 20$  mg nanocluster dissolved in 1mL  $\text{CD}_2\text{Cl}_2$ .

### 3. X-ray crystallographic determination of $\text{Ag}_{42}$ and $\text{Ag}_{61}$ .

The data collection for single crystal X-ray diffraction was carried out on a Bruker Smart APEX II CCD diffractometer at 296 K, using graphite-monochromatized Mo  $\text{K}\alpha$  radiation ( $\lambda = 1.54178$  Å). Data reductions and absorption corrections were performed using the SAINT and SADABS programs, respectively. The structure was solved by direct methods and refined with full-matrix least squares on  $F^2$  using the SHELXTL software package. All non-hydrogen atoms were refined

anisotropically. All hydrogen atoms were set in geometrically calculated positions and refined isotropically using a riding model.  
Paragraph.

## Results and Discussion

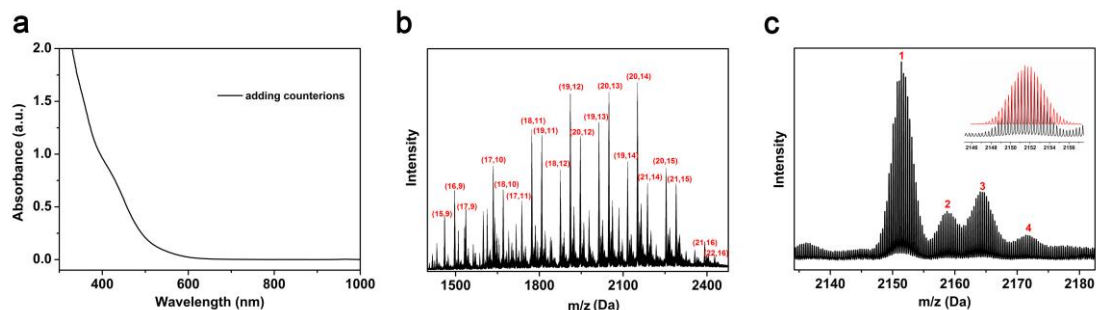

**Figure S1.** (a) UV-vis and (b) ESI-MS spectra of water-soluble precursor in presence of  $\text{NaSbF}_6$ , the numbers in parentheses denote the number of metals and ligands in nanoclusters, (c) the magnified view of the highest peak (20, 14), inset: experimental data (black) and the simulated spectra (red) for peak 1 (i.e.  $[\text{Ag}_{20}(\text{SG})_{14}\text{-}3\text{H}^+]^{3-}$ ), peak 2, 3, and 4 attributed to  $[\text{Ag}_{20}(\text{SG})_{14}\text{+Na}^+\text{-}4\text{H}^+]^{3-}$ ,  $[\text{Ag}_{20}(\text{SG})_{14}\text{+K}^+\text{-}4\text{H}^+]^{3-}$ , and  $[\text{Ag}_{20}(\text{SG})_{14}\text{+Na}^+\text{+K}^+\text{-}5\text{H}^+]^{3-}$ .

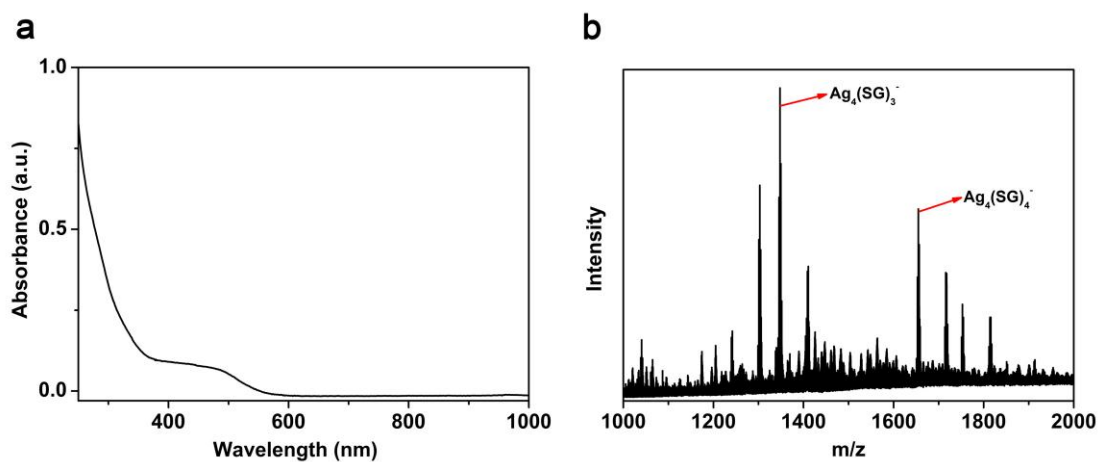

**Figure S2.** (a) UV-vis and (b) ESI-MS spectra of water-soluble precursors in the absence of  $\text{NaSbF}_6$ .

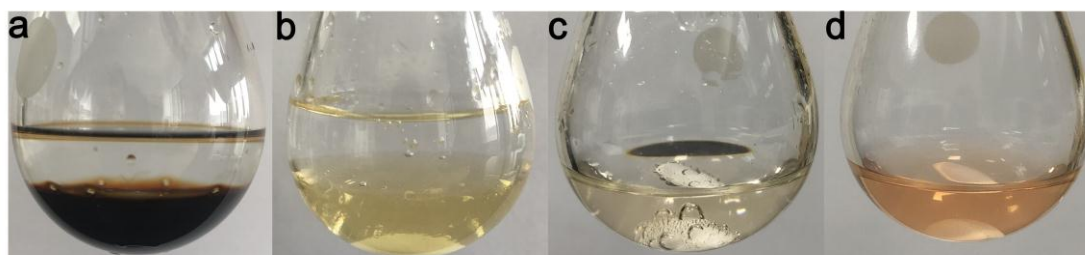

**Figure S3.** Digital photographs of products obtained by two phase ligand exchange (a) after adding  $\text{NaSbF}_6$ , and (b)  $\text{NaBPh}_4$ . The lower solution is dichloromethane and the upper solution is water. Under the same conditions, after adding (c)  $\text{KPF}_6$  and (d)  $\text{NaAlF}_6$ , the color of the aqueous solution was light, indicating that the metal complexes were not reduced and cannot be used for ligand exchange.

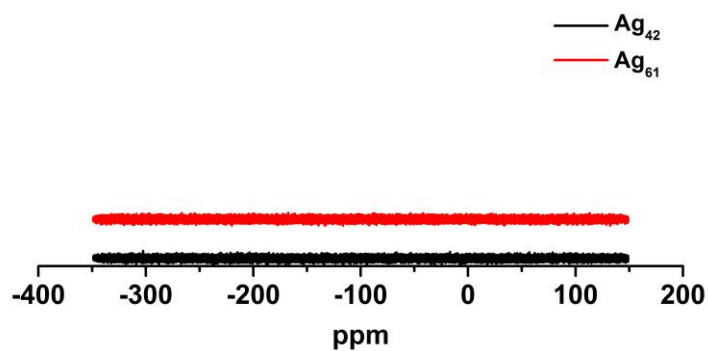

**Figure S4.**  $^{19}\text{F}$ -NMR of  $\text{Ag}_{42}$  and  $\text{Ag}_{61}$ .

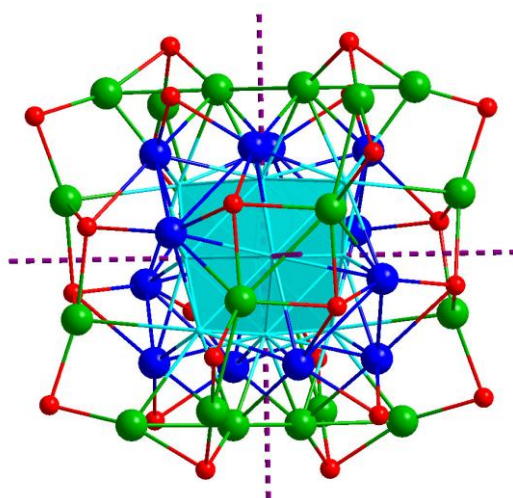

**Figure S5.** The total structure comprises three  $\text{C}_2$  symmetry axis perpendicular to each other.

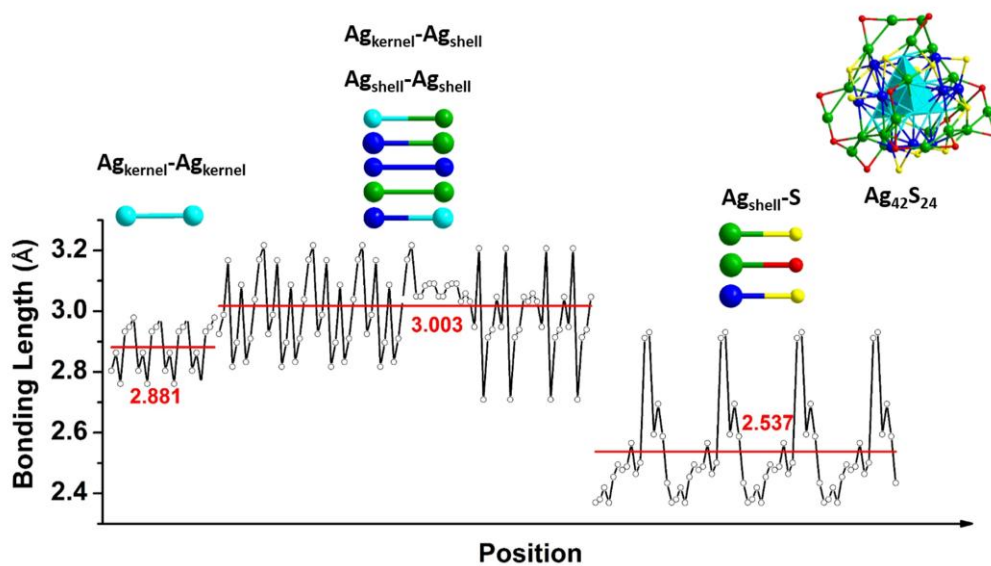

**Figure S6.** The bond length distributions in the  $\text{Ag}_{42}$  nanocluster. (Color labels: Ag, turquoise/green/blue; S, red/yellow; Cl, violet. For clarity, all C and H atoms are omitted).

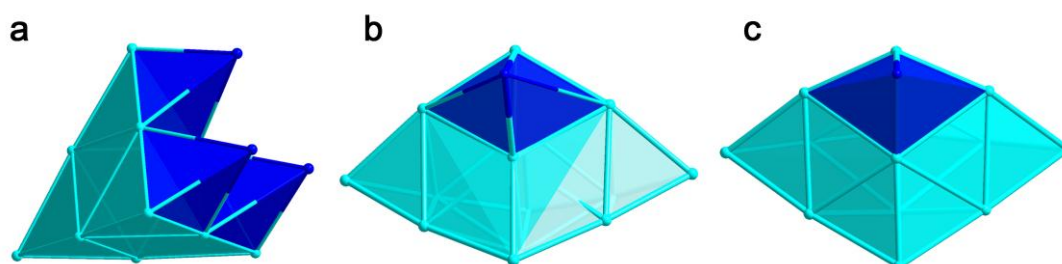

**Figure S7.** (a) The triangle growth of the kernel of  $\text{Ag}_{42}$ , and (b, c) the two face-fused bi-tetrahedron in  $\text{Ag}_{61}$ .

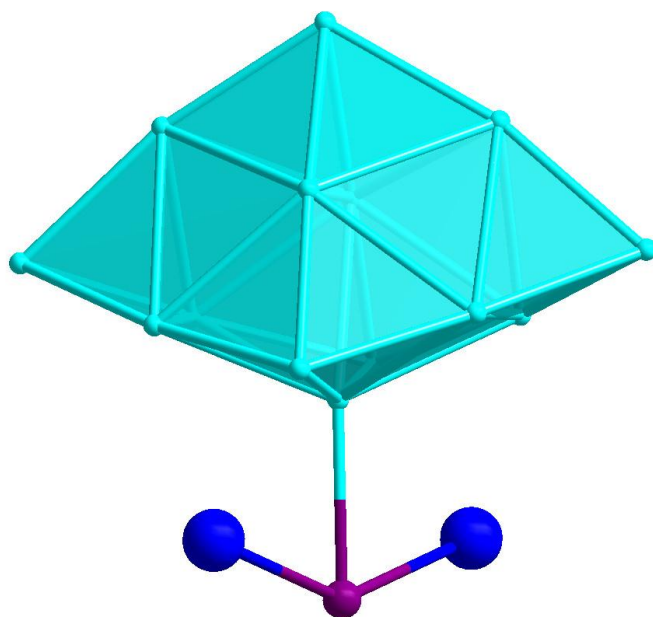

**Figure S8.** The binding mode of  $\mu_3$ -Cl atom with the three neighboring silver atoms.

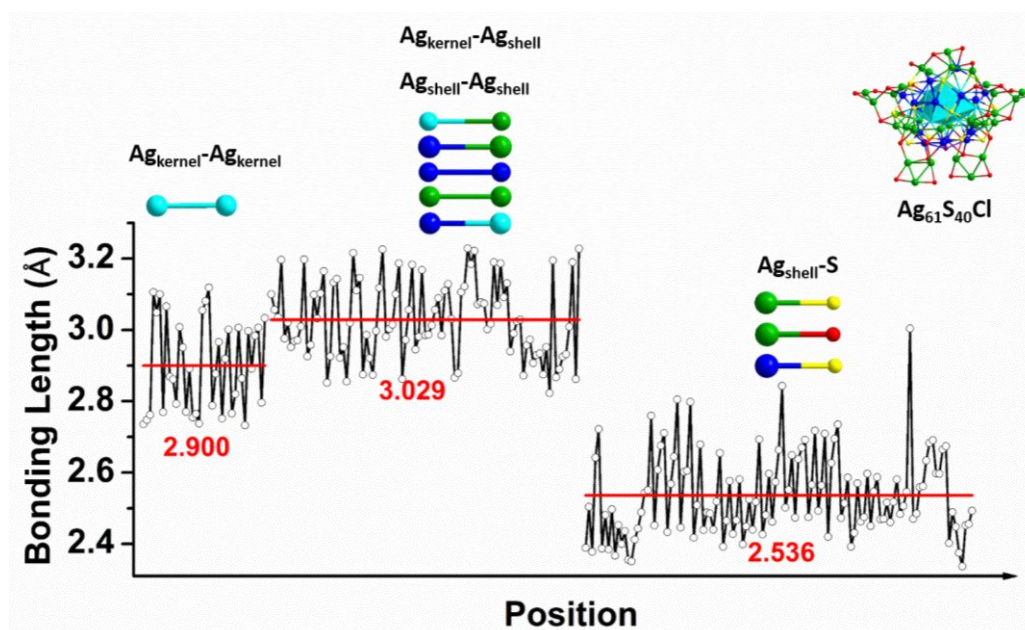

**Figure S9.** The bond length distributions in the  $\text{Ag}_{61}$  nanocluster. (Color labels: Ag, turquoise/green/blue; S, red/yellow; Cl, violet. For clarity, all C and H atoms are omitted).

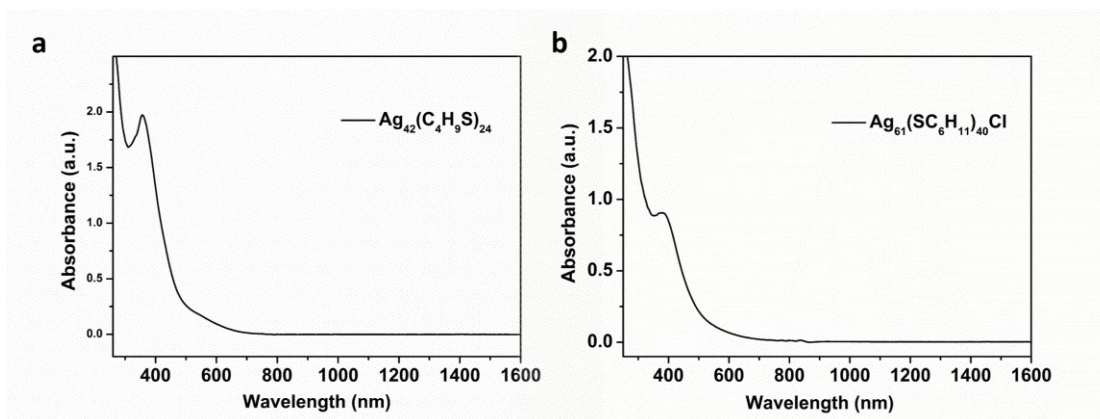

Figure S10. UV-vis-NIR spectra of (a)  $\text{Ag}_{42}$  and (b)  $\text{Ag}_{61}$  NCs.

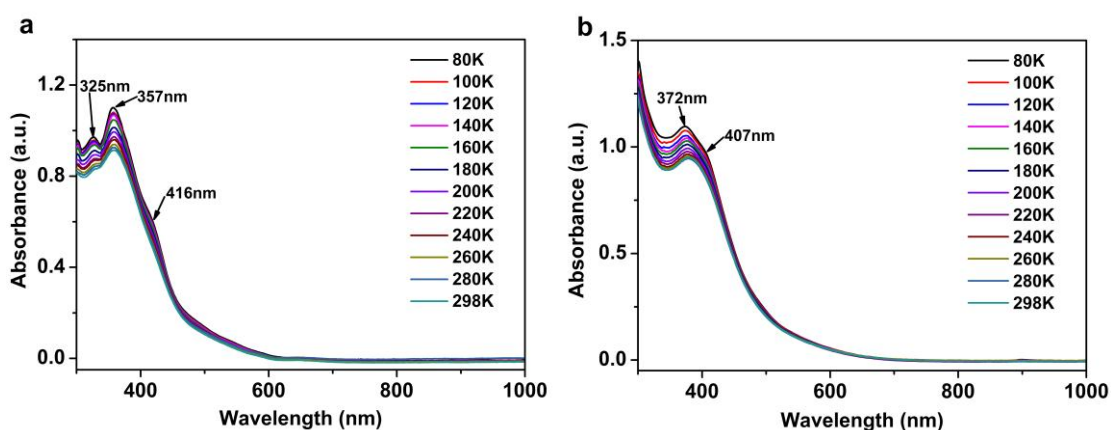

Figure S11. Temperature-dependent UV-vis spectra of (a)  $\text{Ag}_{42}$  and (b)  $\text{Ag}_{61}$  NCs dissolved in a 2-Methyltetrahydrofuran.

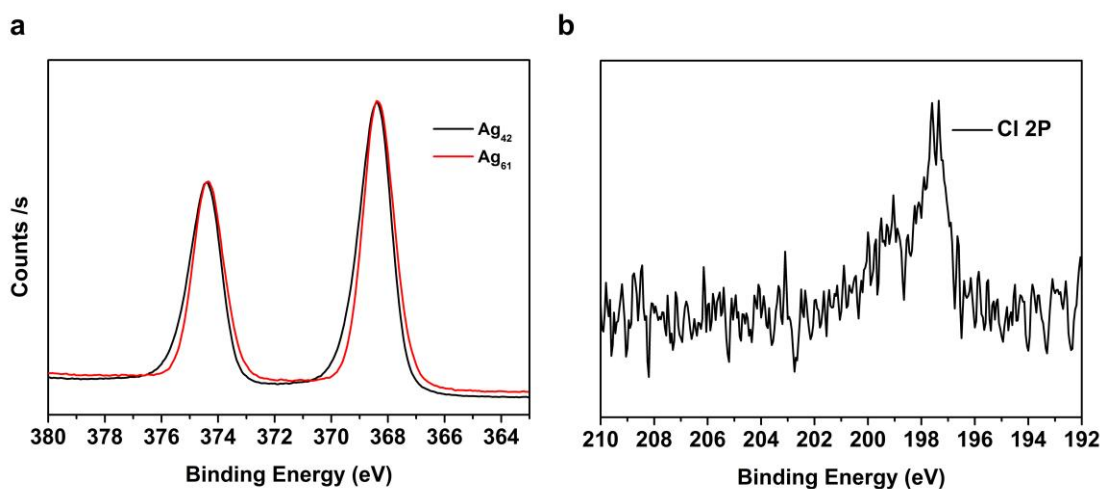

Figure S12. (a) Ag 3d XPS spectra of  $\text{Ag}_{42}$  and  $\text{Ag}_{61}$  NCs. (b) The Cl 2p spectra of  $\text{Ag}_{61}$  NCs.



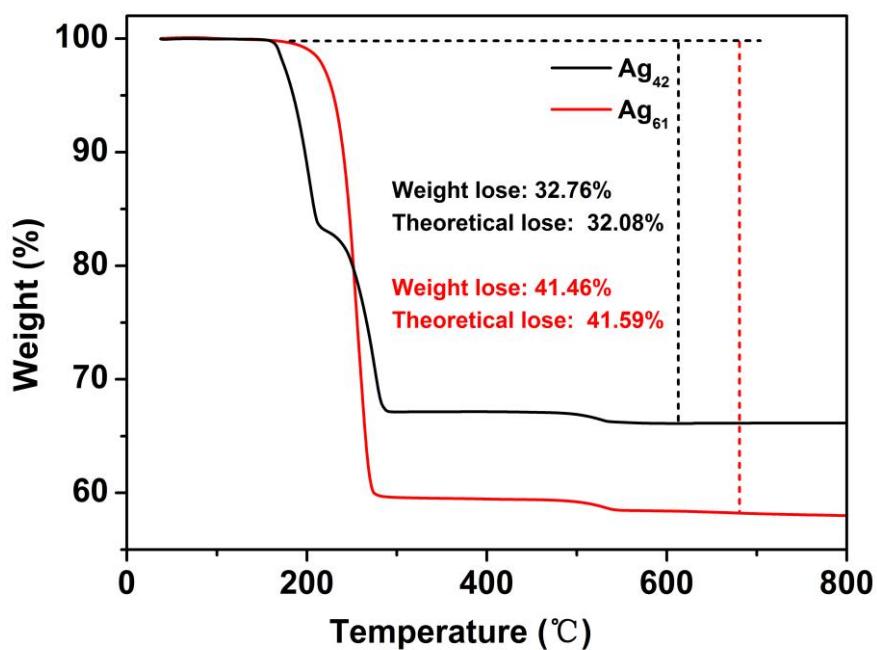

Figure S13. TGA of  $\text{Ag}_{42}$  and  $\text{Ag}_{61}$ .

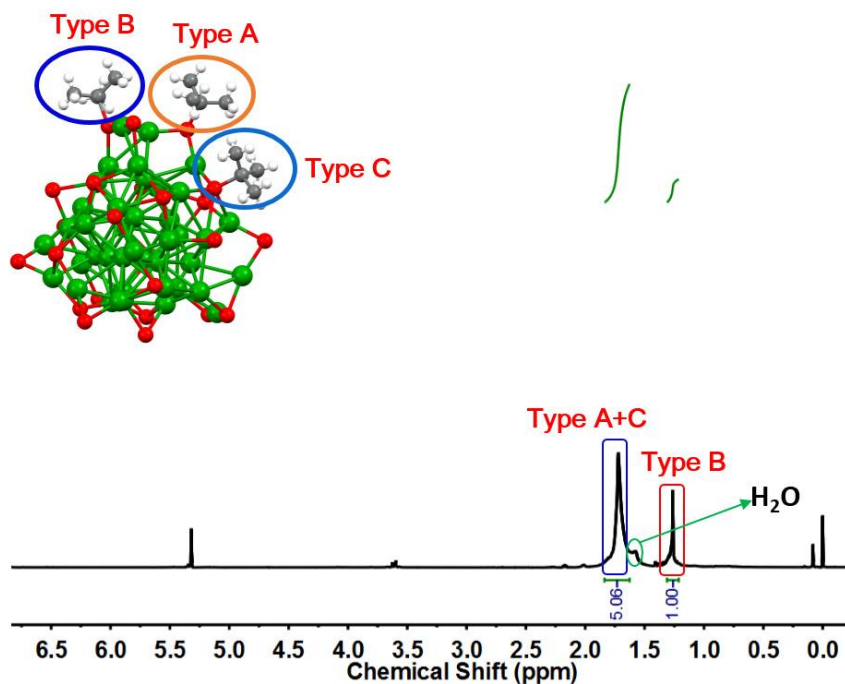

Figure S14.  $^1\text{H-NMR}$  spectrum of the  $\text{Ag}_{42}$  nanocluster,  $\text{Ag}_{42}$  in  $\text{CD}_2\text{Cl}_2$  showed two resonances (1.26 and 1.72 ppm) in a ratio of 1 : 5, which is consistent with the numbers of the types of  $^t\text{BuS-}$  ligands (Type B : Type A+C = 4 : 20 ), and  $\delta$  (1.54) is assigned to  $\text{H}_2\text{O}$ .

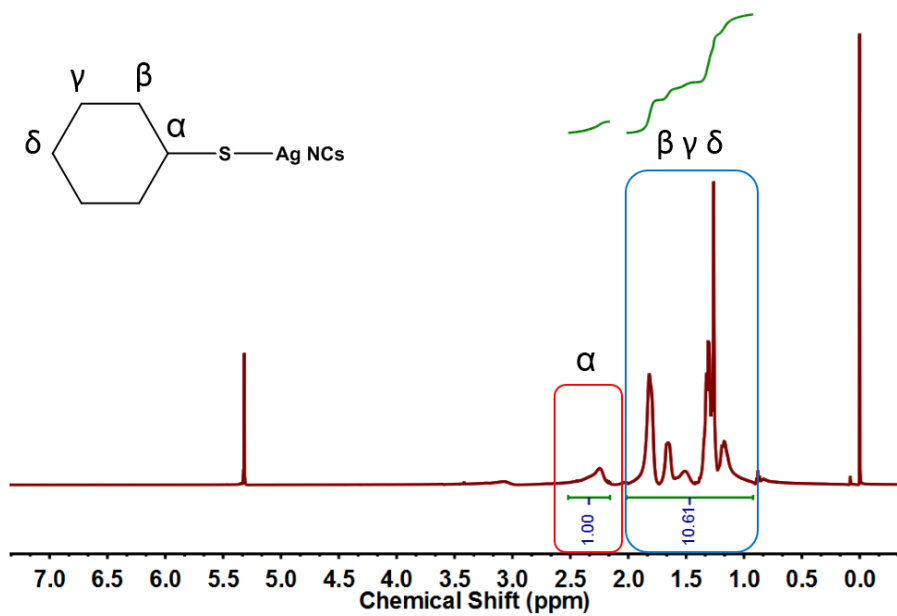

**Figure S15.** <sup>1</sup>H-NMR spectrum of the Ag<sub>61</sub> nanocluster, the peaks at (2.12-2.51 ppm) are assigned to α-CH, the peaks at (0.93-2.05 ppm) mainly correspond to β-CH<sub>2</sub>, γ-CH<sub>2</sub> and δ-CH<sub>2</sub> with integrals of 1:10.

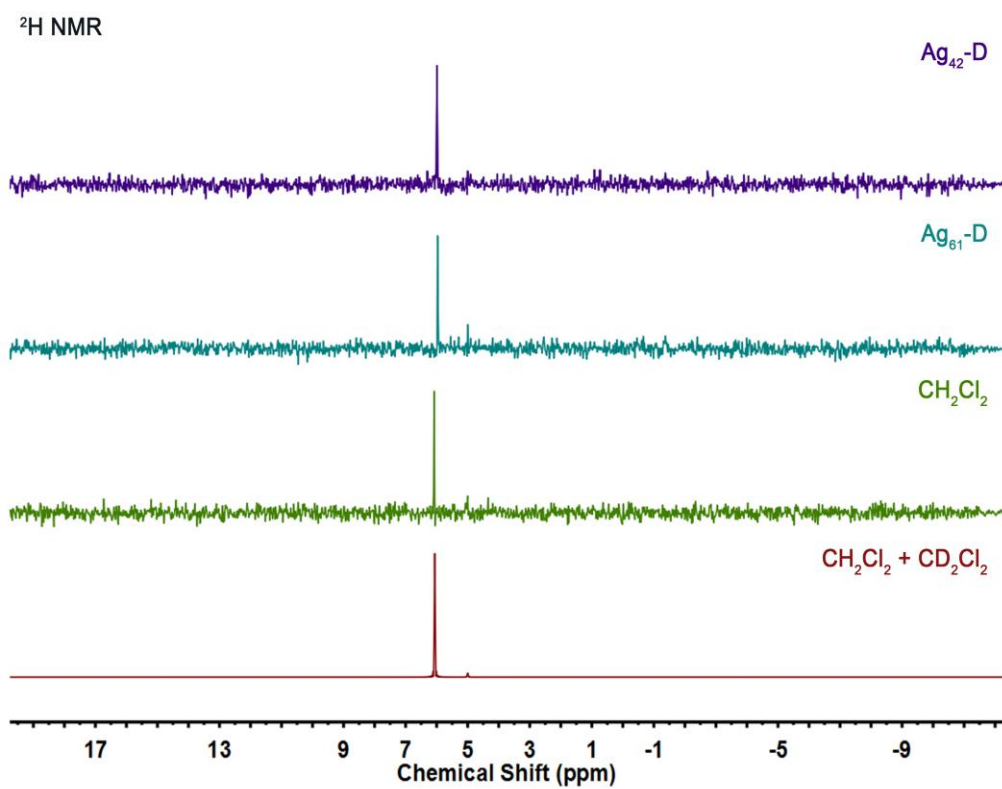

**Figure S16.**  $^2\text{H}$ -NMR spectra of  $\text{Ag}_{42}\text{-D}$  (purple line), (b)  $\text{Ag}_{61}\text{-D}$  (teal line),  $\text{CH}_2\text{Cl}_2$  (green line), (d)  $\text{CH}_2\text{Cl}_2 + \text{CD}_2\text{Cl}_2$  (maroon line). (The solvent is dichloromethane.)

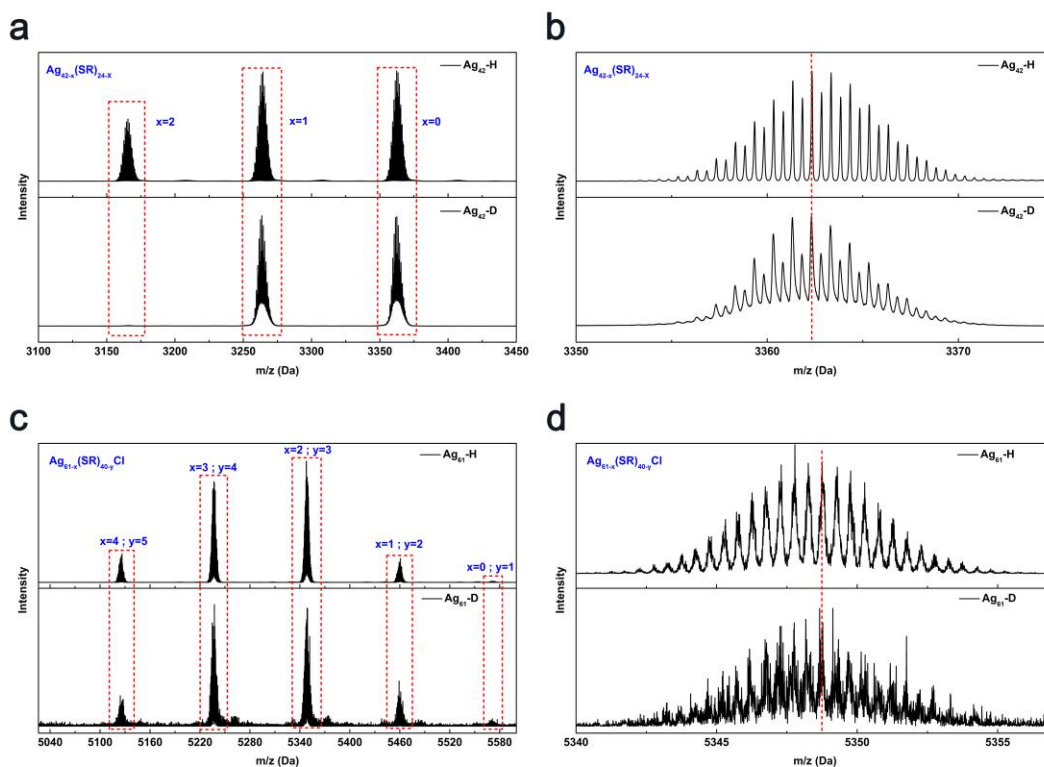

**Figure S17.** ESI-MS spectra of (a) **Ag<sub>42</sub>-H** and **Ag<sub>42</sub>-D** (**Ag<sub>42</sub>-H** represents the use of NaBH<sub>4</sub> as reducing agent, and **Ag<sub>42</sub>-D** represents the use of NaBD<sub>4</sub> as reducing agent),  $x = 0$ ,  $x = 1$ ,  $x = 2$  were assigned to  $[\text{Ag}_{42}(\text{SC}_4\text{H}_9)_{24} + \text{CH}_3\text{OH} + \text{Na}^+ + \text{H}^+]^{2+}$ ,  $[\text{Ag}_{41}(\text{SC}_4\text{H}_9)_{23} + \text{CH}_3\text{OH} + \text{Na}^+ + \text{H}^+]^{2+}$  and  $[\text{Ag}_{40}(\text{SC}_4\text{H}_9)_{22} + \text{CH}_3\text{OH} + \text{Na}^+ + \text{H}^+]^{2+}$ , respectively; (b) Enlarged view of **Ag<sub>42</sub>-H** and **Ag<sub>42</sub>-D** at  $x = 0$ ; (c) **Ag<sub>61</sub>-H** and **Ag<sub>61</sub>-D**,  $x = 0$ ,  $x = 1$ ,  $x = 2$ ,  $x = 3$ ,  $x = 4$  were assigned to  $[\text{Ag}_{61}(\text{SC}_6\text{H}_{11})_{39}\text{Cl} + \text{H}^+]^{2+}$ ,  $[\text{Ag}_{60}(\text{SC}_6\text{H}_{11})_{38}\text{Cl} + \text{CH}_3\text{OH} + \text{H}^+]^{2+}$ ,  $[\text{Ag}_{59}(\text{SC}_6\text{H}_{11})_{37}\text{Cl} + \text{CH}_3\text{OH} + \text{H}^+]^{2+}$ ,  $[\text{Ag}_{58}(\text{SC}_6\text{H}_{11})_{36}\text{Cl} + \text{CH}_3\text{OH} + \text{H}^+]^{2+}$ ,  $[\text{Ag}_{57}(\text{SC}_6\text{H}_{11})_{35}\text{Cl} + \text{CH}_3\text{OH} + \text{H}^+]^{2+}$ , respectively; (d) Enlarged view of **Ag<sub>61</sub>-H** and **Ag<sub>61</sub>-D** at  $x = 2$ .

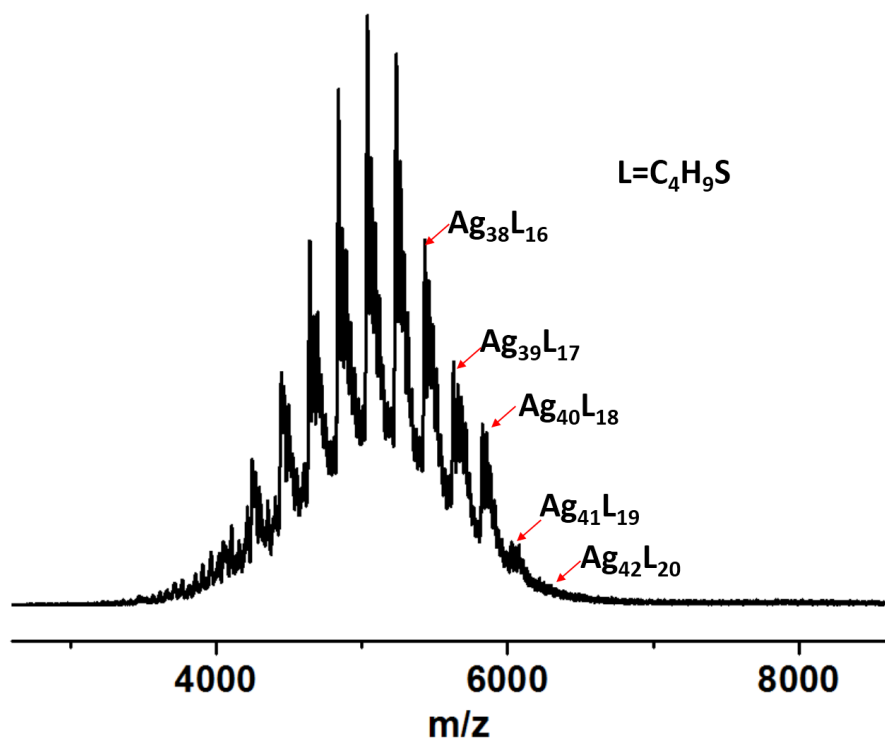

**Figure S18.** MALDI-MS spectrum of **Ag<sub>42</sub>** (**Ag<sub>42</sub>** crystal soluble in CH<sub>2</sub>Cl<sub>2</sub> solvent) in linear positive ionization mode using DCTB as matrix. The peak with the largest molecular weight corresponds to **Ag<sub>42</sub>(C<sub>4</sub>H<sub>9</sub>S)<sub>20</sub>**. And each of two adjacent peaks separated  $m/z = 198.0$  Da, assigned to **Ag-SC<sub>4</sub>H<sub>9</sub>**.

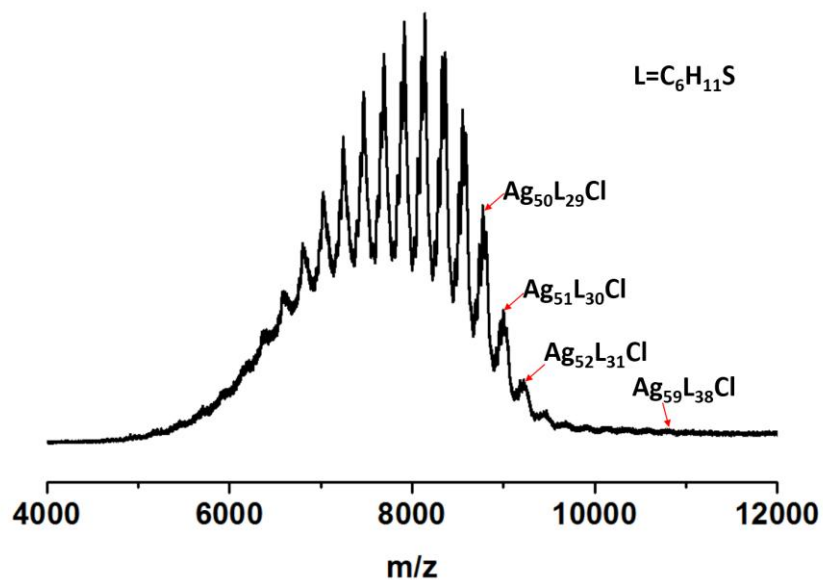

**Figure S19.** MALDI-MS spectrum of  $\text{Ag}_{61}$  ( $\text{Ag}_{61}$  crystal soluble in  $\text{CH}_2\text{Cl}_2$  solvent) in linear positive ionization mode using DCTB as matrix. The peak with the largest molecular weight corresponds to  $\text{Ag}_{59}(\text{C}_6\text{H}_{11}\text{S})_{38}\text{Cl}$ . And each of two adjacent peaks separated  $m/z = 221.9$  Da, assigned to  $\text{Ag-SC}_6\text{H}_{11}$ .

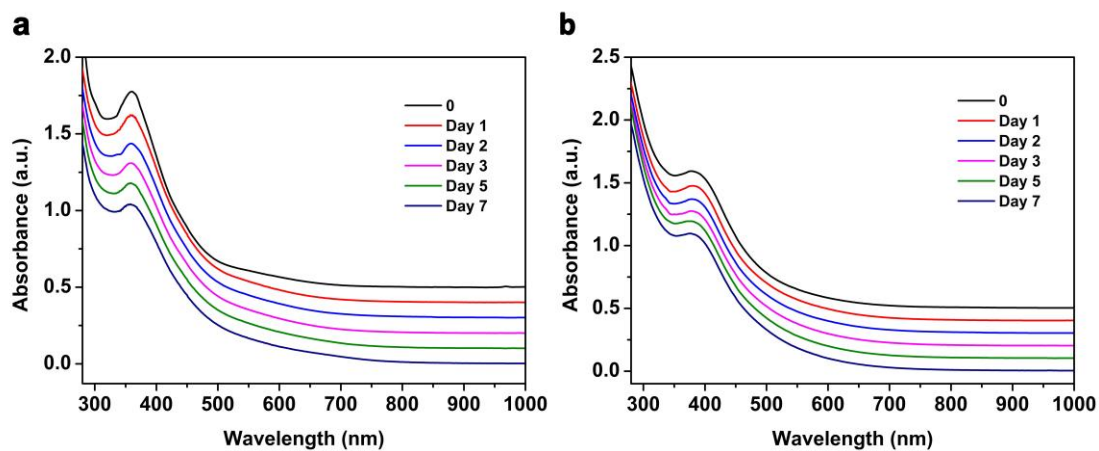

**Figure S20.** Thermostability of (a)  $\text{Ag}_{42}$  and (b)  $\text{Ag}_{61}$  at room temperature.

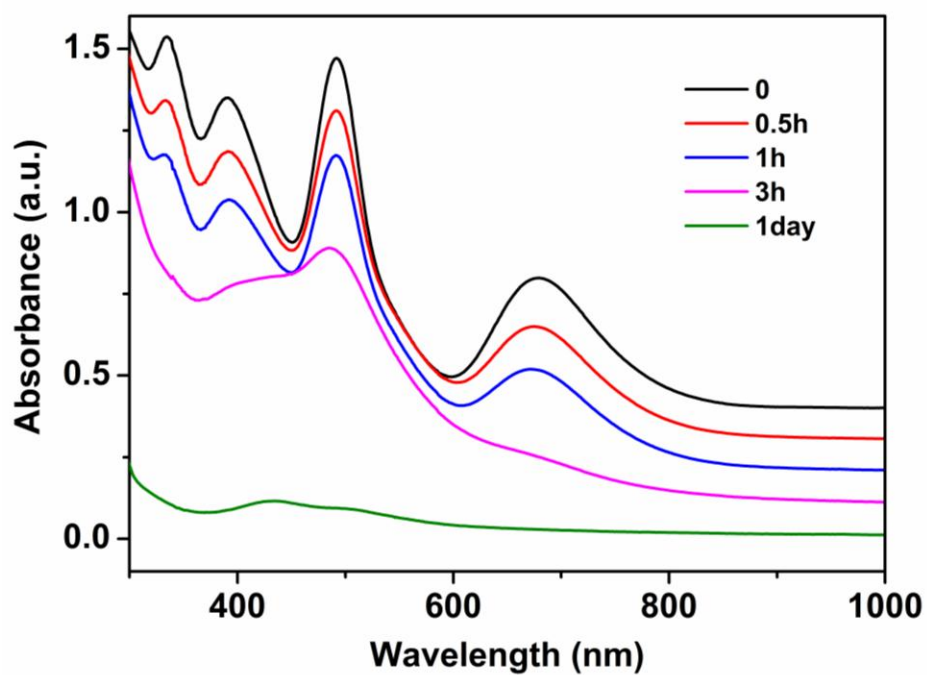

**Figure S21.** Thermostability of  $[\text{Ag}_{25}(\text{SPhMe}_2)_{18}]^-$  at room temperature.

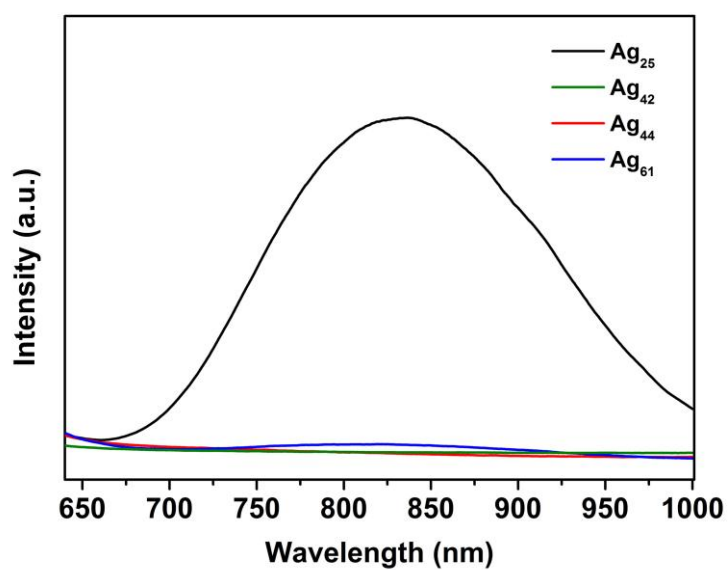

**Figure S22.** Photoluminescence spectra of  $\text{Ag}_{25}(\text{SR})_{18}^-$ ,  $\text{Ag}_{42}(\text{SR})_{24}$ ,  $\text{Ag}_{44}(\text{SR})_{30}^{4-}$  and  $\text{Ag}_{61}(\text{SR})_{40}\text{Cl}$  using dichloromethane as solvent (excited at 365nm).

**Table S1 Crystal data and structure refinement for Ag<sub>42</sub>(SC<sub>4</sub>H<sub>9</sub>)<sub>24</sub>**

|                                   |                                                                                      |          |
|-----------------------------------|--------------------------------------------------------------------------------------|----------|
| Identification code               | Ag <sub>42</sub> (SC <sub>4</sub> H <sub>9</sub> ) <sub>24</sub>                     |          |
| Empirical formula                 | C <sub>50.50</sub> H <sub>113</sub> Ag <sub>21</sub> C <sub>15</sub> S <sub>12</sub> |          |
| Formula weight                    | 3547.64                                                                              |          |
| Temperature                       | 173 K                                                                                |          |
| Wavelength                        | 0.71073 Å                                                                            |          |
| Crystal system                    | Orthorhombic                                                                         |          |
| Space group                       | P222                                                                                 |          |
| Unit cell dimensions              | a = 19.018(2) Å                                                                      | α = 90°. |
|                                   | b = 19.679(2) Å                                                                      | β = 90°. |
|                                   | c = 26.250(3) Å                                                                      | γ = 90°. |
| Volume                            | 9824.2(18) Å <sup>3</sup>                                                            |          |
| Z                                 | 4                                                                                    |          |
| Density (calculated)              | 2.399 Mg/m <sup>3</sup>                                                              |          |
| Absorption coefficient            | 4.494 mm <sup>-1</sup>                                                               |          |
| F(000)                            | 6720                                                                                 |          |
| Theta range for data collection   | 0.776 to 25.999°.                                                                    |          |
| Index ranges                      | -24<=h<=24, -25<=k<=19, -33<=l<=32                                                   |          |
| Reflections collected             | 71886                                                                                |          |
| Independent reflections           | 19208 [R(int) = 0.0478]                                                              |          |
| Completeness to theta = 25.242°   | 99.9 %                                                                               |          |
| Absorption correction             | Semi-empirical from equivalents                                                      |          |
| Max. and min. transmission        | 0.7455 and 0.5628                                                                    |          |
| Refinement method                 | Full-matrix least-squares on F <sup>2</sup>                                          |          |
| Data / restraints / parameters    | 19208 / 336 / 875                                                                    |          |
| Goodness-of-fit on F <sup>2</sup> | 1.029                                                                                |          |
| Final R indices [I>2sigma(I)]     | R1 = 0.0866, wR2 = 0.2111                                                            |          |
| R indices (all data)              | R1 = 0.1157, wR2 = 0.2415                                                            |          |
| Absolute structure parameter      | 0.028(15)                                                                            |          |
| Extinction coefficient            | n/a                                                                                  |          |
| Largest diff. peak and hole       | 3.463 and -4.237 e.Å <sup>-3</sup>                                                   |          |

**Table S2. Crystal data and structure refinement for Ag<sub>61</sub>(SC<sub>6</sub>H<sub>11</sub>)<sub>40</sub>Cl**

|                                   |                                                                                    |          |
|-----------------------------------|------------------------------------------------------------------------------------|----------|
| Identification code               | Ag <sub>61</sub> (SC <sub>6</sub> H <sub>11</sub> ) <sub>40</sub> Cl               |          |
| Empirical formula                 | C <sub>242</sub> H <sub>444</sub> Ag <sub>61</sub> Cl <sub>5</sub> S <sub>40</sub> |          |
| Formula weight                    | 11393.67                                                                           |          |
| Temperature                       | 296.15 K                                                                           |          |
| Wavelength                        | 0.71073 Å                                                                          |          |
| Crystal system                    | Orthorhombic                                                                       |          |
| Space group                       | P2 <sub>1</sub> 2 <sub>1</sub> 2 <sub>1</sub>                                      |          |
| Unit cell dimensions              | a = 22.088(11) Å                                                                   | α = 90°. |
|                                   | b = 39.696(19) Å                                                                   | β = 90°. |
|                                   | c = 39.85(2) Å                                                                     | γ = 90°. |
| Volume                            | 34941(30) Å <sup>3</sup>                                                           |          |
| Z                                 | 4                                                                                  |          |
| Density (calculated)              | 2.166 Mg/m <sup>3</sup>                                                            |          |
| Absorption coefficient            | 3.641 mm <sup>-1</sup>                                                             |          |
| F(000)                            | 21952                                                                              |          |
| Crystal size                      | 0.12 x 0.1 x 0.03 mm <sup>3</sup>                                                  |          |
| Theta range for data collection   | 2.115 to 29.825°.                                                                  |          |
| Index ranges                      | -29<=h<=30, -33<=k<=55, -55<=l<=45                                                 |          |
| Reflections collected             | 229686                                                                             |          |
| Independent reflections           | 97131 [R(int) = 0.0802]                                                            |          |
| Completeness to theta = 25.242°   | 98.8 %                                                                             |          |
| Absorption correction             | Semi-empirical from equivalents                                                    |          |
| Max. and min. transmission        | 0.7552 and 0.258                                                                   |          |
| Refinement method                 | Full-matrix-block least-squares on F <sup>2</sup>                                  |          |
| Data / restraints / parameters    | 97131 / 3132 / 3133                                                                |          |
| Goodness-of-fit on F <sup>2</sup> | 1.085                                                                              |          |
| Final R indices [I>2σ(I)]         | R1 = 0.0897, wR2 = 0.2160                                                          |          |
| R indices (all data)              | R1 = 0.1429, wR2 = 0.2502                                                          |          |
| Absolute structure parameter      | 0.073(14)                                                                          |          |
| Extinction coefficient            | n/a                                                                                |          |
| Largest diff. peak and hole       | 6.451 and -3.765 e.Å <sup>-3</sup>                                                 |          |
